# Supplementary material
Source: publisher figshare collection journal article supplement (https://acs.figshare.com/ndownloader/files/13390508)
Supplement: Supplementary file 1 [file 13390508]

## Supporting Information

### **Protein Corona Formed from Different Blood Plasma Proteins Affects the Colloidal Stability of Nanoparticles Differently**

*Yan Teck Ho<sup>1</sup>, Nurul 'Ain Azman<sup>2</sup>, Fion Wen Yee Loh<sup>2</sup>, Gabriella Kai Teng Ong<sup>2</sup>, Gokce Engudar<sup>2†</sup>, Seth Allan Kriz<sup>3</sup>, James Chen Yong Kah<sup>1,2 \*</sup>*

<sup>1</sup>NUS Graduate School for Integrative Sciences and Engineering, National University of Singapore, Centre for Life Sciences (CeLS), 28 Medical Drive, #05-01, Singapore 117456.

<sup>2</sup>Department of Biomedical Engineering, National University of Singapore, 4 Engineering Drive 3, Engineering Block 4, #04-08, Singapore 117583.

<sup>3</sup>Department of Chemical Engineering, Michigan Technological University, Building 203, 1400 Townsend Drive, Houghton, Michigan 49931, United States of America.

<sup>†</sup>Current address: Department of Chemistry, Technical University of Denmark, 2800 Lyngby, Denmark.

CORRESPONDING AUTHOR

[\\*biekahj@nus.edu.sg](mailto:*biekahj@nus.edu.sg)

Table S1. Protein:AuNP incubation ratios for the transport related proteins (ApoA1 and HSA) and immune related proteins (IgG and FBG) used to investigate how different protein:AuNP ratios for different proteins affect the hydrodynamic diameter and aggregation of the AuNPs at physiological pH.

|                   |                                                             |
|-------------------|-------------------------------------------------------------|
| <b>ApoA1:AuNP</b> | 0, 2.1, 4.2, 6.3, 8.5, 10.6, 12.7, 19.0, 25.3               |
| <b>HSA:AuNP</b>   | 0, 3, 6, 9, 12, 15, 18, 30, 60, 90, 120                     |
| <b>IgG:AuNP</b>   | 0, 2, 4, 6, 8, 10, 12, 20, 30, 50, 70, 90                   |
| <b>FBG:AuNP</b>   | 0, 0.4, 0.8, 1, 4, 6, 8, 10, 12, 15, 20, 25, 30, 50, 70, 90 |

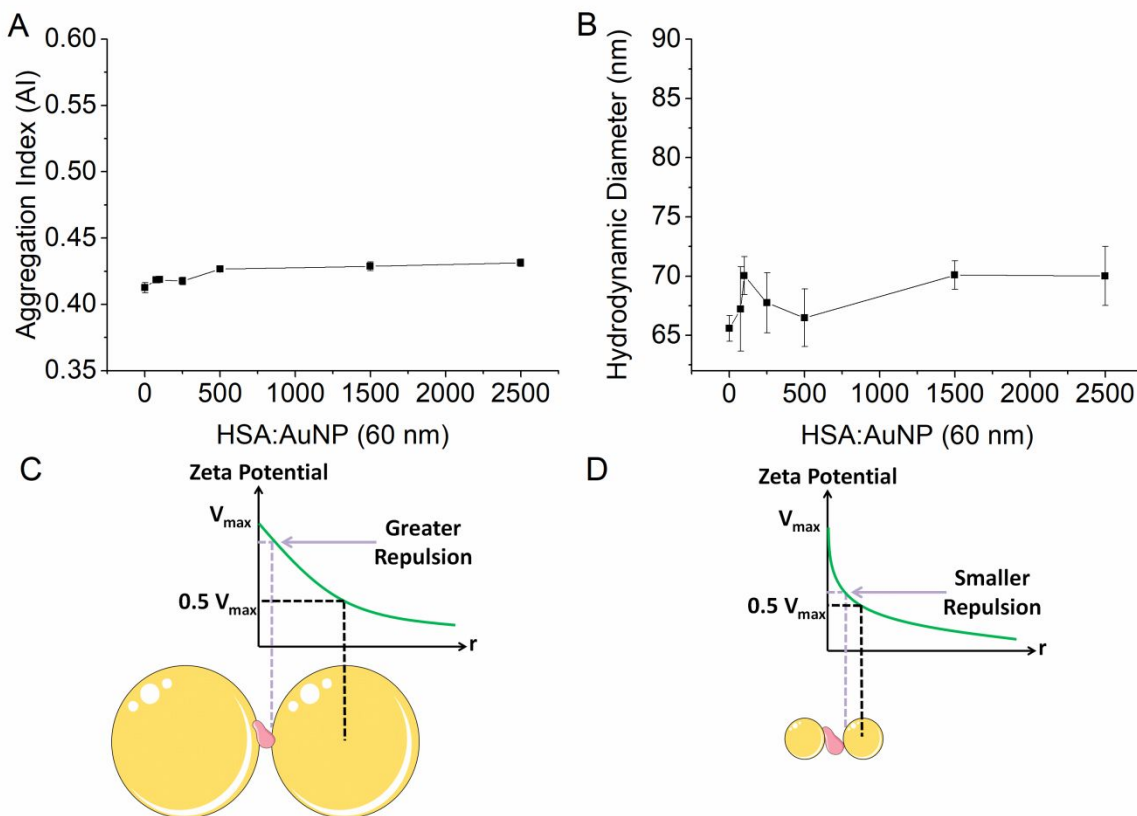

Figure S1. (A) AI, and (B) hydrodynamic diameter,  $D_H$  of 60 nm citrate-capped AuNPs at different HSA:AuNP incubation ratios, after incubating the AuNPs with HSA for 24 h at 37 °C in physiological pH of 7.4. No significant changes in AI or  $D_H$  were observed at all ratios. (C) This was likely due to the significantly smaller size of HSA compared to the 60 nm AuNPs, which would result in greater repulsion between adjacent 60 nm AuNPs bridged by the HSA molecule (Zeta potential curve illustrated belongs to the AuNP on the left. For reference,  $0.5 V_{\max}$  is taken to occur at the centre of the adjacent AuNP). (D) This is in contrast to the smaller 20 nm AuNPs of comparable size to HSA where the inter-particle distance bridged by HSA resulted in a smaller repulsion force and hence energetically more favorable aggregated state (Zeta potential curve illustrated belongs to the AuNP on the left. For reference,  $0.5 V_{\max}$  is taken to occur at the centre of the adjacent AuNP).

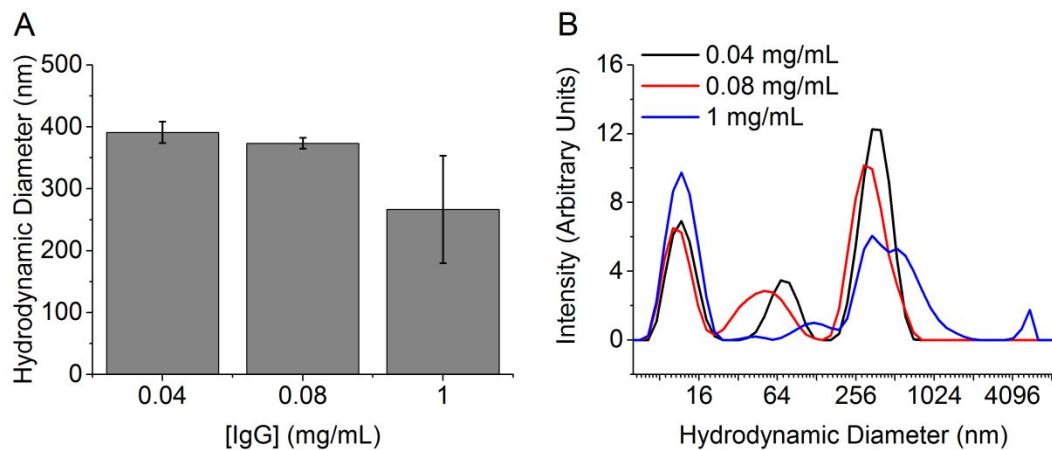

Figure S2. (A) Average hydrodynamic diameter ( $D_H$ ) as given by the Z-average and (B) histogram distributions of  $D_H$  of 0.04, 0.08, and 1 mg/mL free IgG in 10 mM sodium phosphate buffer. The free IgG concentration of 0.08 mg/mL is comparable to the IgG concentration at IgG:AuNP = 90 used in this study.

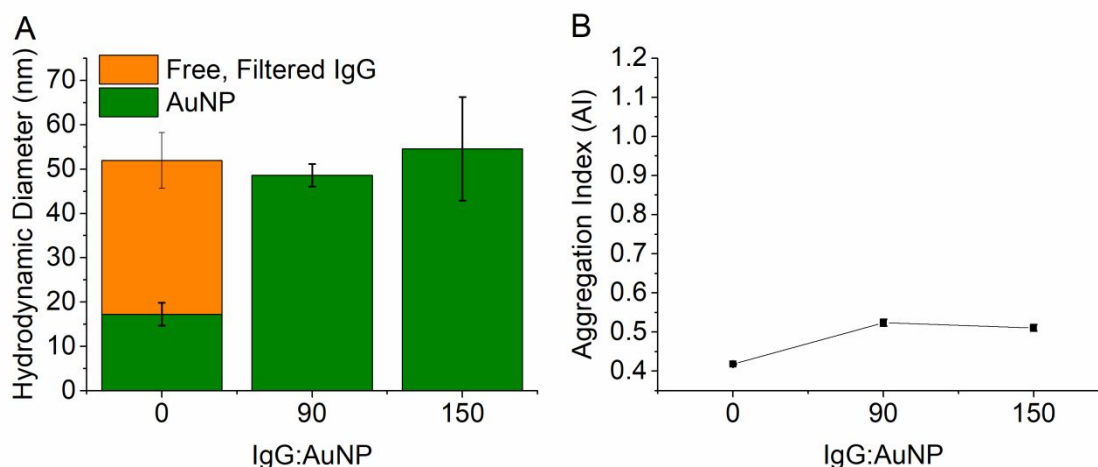

Figure S3. (A) Average hydrodynamic diameter ( $D_H$ ) of 20 nm citrate-capped AuNPs after incubation with IgG at high IgG:AuNP ratios of 90 and 150 for 24 h at 37 °C in physiological pH of 7.4 (green bars). The IgG was subsequently filtered with 200 nm pore size syringe filters to remove IgG agglomerates before incubating with AuNPs again. The resulting  $\Delta D_H$  of the AuNP-IgG complex at incubation ratios of 90 and 150 were comparable to the size of the filtered, free IgG molecules (orange bar), thus suggesting the formation of an IgG monolayer on the surface of the 20 nm AuNPs. (B) Corresponding AI of the AuNP-IgG complex at high IgG:AuNP ratios indicating minimal aggregation of AuNPs as the IgG formed a steric layer around the AuNPs.

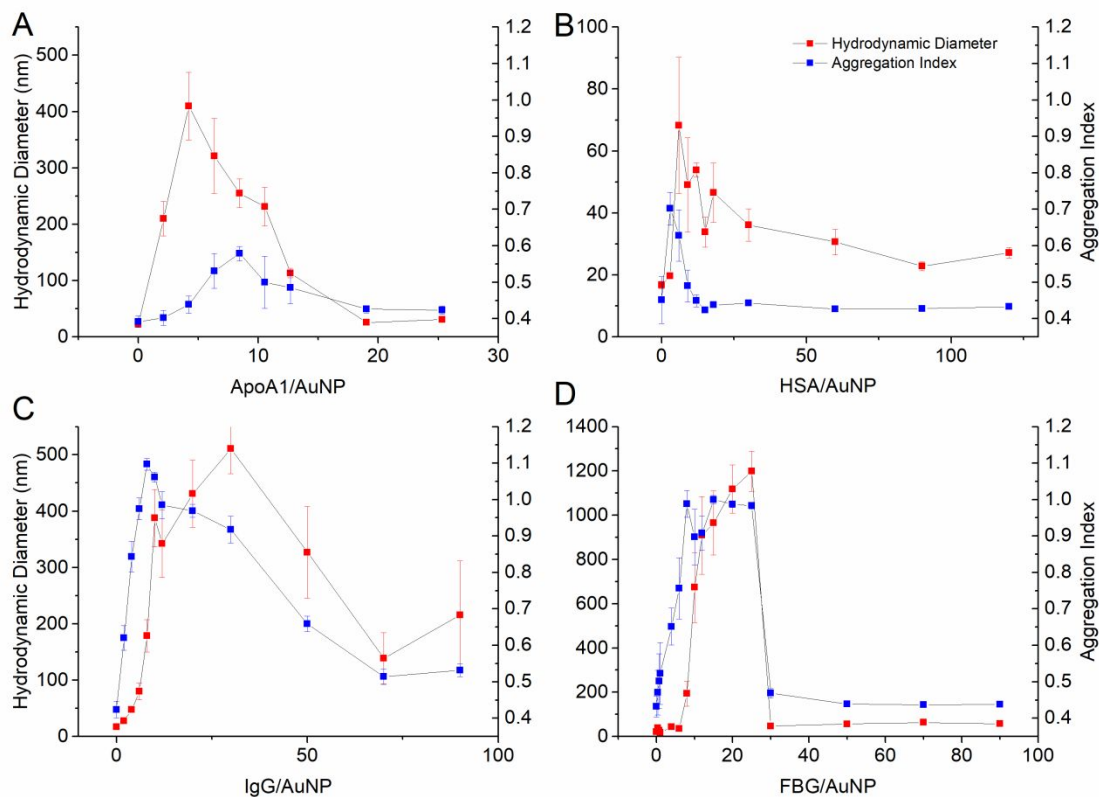

Figure S4. Juxtaposing the plots of AI against protein:AuNP incubation ratio in Figure 2 and  $D_H$  against protein:AuNP incubation ratio in Figure 3 of the main manuscript together for (A) ApoA1; (B) HSA; (C) IgG; and (D) FBG. The changes in AI corresponded well to changes in  $D_H$ , suggesting that the increase in  $D_H$  observed in Figure 3 was largely contributed by the aggregation of AuNPs induced by the non-specific adsorption of proteins.
